# Connectome-Based Smoothing (CBS): Concepts, methods, and evaluation

Sina Mansour L.<sup>1,\*</sup>, Caio Seguin<sup>2,3</sup>, Robert E. Smith<sup>4,5</sup>, and Andrew Zalesky<sup>1,2</sup>

<sup>1</sup>Department of Biomedical Engineering, The University of Melbourne, Parkville, Victoria, Australia

<sup>2</sup>Melbourne Neuropsychiatry Centre, Department of Psychiatry, The University of Melbourne and Melbourne Health, Parkville, Victoria, Australia

<sup>3</sup>The University of Sydney, School of Biomedical Engineering, Sydney, Australia

<sup>4</sup>The Florey Institute of Neuroscience and Mental Health, Heidelberg, Victoria, Australia

<sup>5</sup>Florey Department of Neuroscience and Mental Health, The University of Melbourne, Parkville, Victoria, Australia

\*To whom correspondence should be addressed. Email: [sina.mansour.lakouraj@gmail.com](mailto:sina.mansour.lakouraj@gmail.com)

(Dated: August 25, 2021)

## Abstract

Structural connectomes are increasingly mapped at high spatial resolutions comprising many hundreds—if not thousands—of network nodes. However, high-resolution connectomes are particularly susceptible to image registration misalignment, tractography artifacts, and noise, all of which can lead to reductions in connectome accuracy and test-retest reliability. We investigate a network analogue of image smoothing to address these key challenges. Connectome-Based Smoothing (CBS) involves jointly applying a carefully chosen smoothing kernel to the two endpoints of each tractography streamline, yielding a spatially smoothed connectivity matrix. We develop computationally efficient methods to perform CBS using a matrix congruence transformation and evaluate a range of different smoothing kernel choices on CBS performance. We find that smoothing substantially improves the identifiability, sensitivity and test-retest reliability of high-resolution connectivity maps, though at a cost of increasing storage burden. For atlas-based connectomes (i.e. low-resolution connectivity maps), we show that CBS marginally improves the statistical power to detect associations between connectivity and cognitive performance, particularly for connectomes mapped using probabilistic tractography. CBS was also found to enable more reliable statistical inference compared to connectomes without any smoothing. We provide recommendations on optimal smoothing kernel parameters for connectomes mapped using both deterministic and probabilistic tractography. We conclude that spatial smoothing is particularly important for the reliability of high-resolution connectomes, but can also provide benefits at lower parcellation resolutions. We hope that our work enables computationally efficient integration of spatial smoothing into established structural connectome mapping pipelines.

## Highlights:

- We establish a network equivalent of image smoothing for structural connectomes.
- Connectome-Based Smoothing (CBS) improves connectome test-retest reliability, identifiability and sensitivity.
- CBS also facilitates reliable inference and improves power to detect statistical associations.
- Both high-resolution and atlas-based connectomes can benefit from CBS.

**Keywords:** Structural connectivity | Connectome smoothing | High-resolution connectomics | Tractography

## 1. Introduction

Spatial smoothing is widely recognized as a crucial preprocessing step in many neuroimaging pipelines. It can increase the signal-to-noise ratio (SNR) by eliminating the high-frequency spatial components of noise [1–5] and is typically used in different neuroimaging modalities such as structural mag-

netic resonance imaging (MRI) [6–8], functional MRI [9–13], positron emission tomography (PET) [14–17], magnetoencephalography (MEG) [18, 19], electroencephalography (EEG) [20], and functional near-infrared spectroscopy (fNIRS) [21, 22]. As a result, options for spatial smoothing are provided in many neuroimaging toolboxes, such as AFNI [23], FreeSurfer [24], FSL [25], and SPM [26](Friston et

al., 1994).

Structural connectivity computed from diffusion MRI tractography can be used to construct structural connectomes [27–29], and there is considerable interest in performing statistical inference on this graph representation of the brain [30, 31]. However, unlike image-based statistical inference, such data are currently not explicitly smoothed. Most structural connectomes are studied at the resolution of large-scale brain atlases comprising tens to hundreds of regions. The process of assigning tractography streamlines to such large-scale regions manipulates the data in a manner somewhat akin to smoothing. Nonetheless, the potential impact of additional (explicit) smoothing has not yet been evaluated. Moreover, given that connectomes are spatially embedded graphs, conventional univariate smoothing methods are not directly applicable to connectomes, and so smoothing methods tailored to connectome data are required.

High-resolution connectomes are a subset of connectomes that investigate the connectivity structure of the brain at the resolution of cortical vertices/voxels [32]. Recent studies highlight the advantages of investigating structural connectomes at this higher spatial resolution than atlases with coarse parcellations [32–37]. For example, high-resolution structural connectivity maps robustly capture intricate local modular structures in brain networks and provide insightful connectome biomarkers of neural abnormalities [35, 36, 38]. We recently established a computationally efficient framework to map high-resolution structural connectomes, and found that these connectomes enabled accurate prediction of individual behaviors and neural fingerprinting [32]. As part of this recent work, we implemented a preliminary method for connectome-based smoothing, building on earlier structural connectome smoothing approaches [33].

In this study, we extend our earlier work by formalizing the principles of connectome-based smoothing (CBS), aiming to develop efficient computational methods to facilitate connectome smoothing and determine optimal smoothing parameters. We investigate the impact of smoothing on high-resolution and atlas-based connectomes, quantifying its benefits for reliability, identifiability and statistical power. We anticipate that CBS will become a common step in connectome mapping workflows.

## 2. Materials and methods

### 2.1. Connectome-based smoothing

Here, we develop an efficient and scalable method to enable network-based smoothing of spatially-embedded high-resolution connectivity matrices. Unlike conventional spatial smoothing algorithms that are defined in terms of a single smoothing kernel, CBS is inherently bivariate and involves a pair of spatially distant smoothing kernels operating at the two ends of each connection. The framework developed

here extends our recent work on high-resolution connectomes, where we first investigated the concept of connectome-based smoothing [32]. We also acknowledge the seminal work of Besson and colleagues, who found that connectome smoothing improved the reliability of high-resolution connectomes [33].

We use  $A$  to denote the symmetric connectivity matrix inferred from tractography, with size  $v \times v$  where  $v$  is the total number of network nodes and element  $A(i, j)$  stores the streamline count between nodes  $v_i$  and  $v_j$ . This matrix can be decomposed into two half-incidence matrices  $U$  and  $V$ , each of size  $v \times n$ , where  $n$  is the total number of streamlines. These matrices encode the connectivity endpoint information, such that the streamline endpoint pairs are mapped to the columns of  $U$  and  $V$ . For instance, if the  $k$ th streamline ends in nodes  $v_i$  and  $v_j$ , then the  $k$ th columns of  $U$  and  $V$  are vectors with a single non-zero element, with weight 1, respectively located at  $U(i, k)$  and  $V(j, k)$ . This signifies that streamline  $k$  connects the endpoints  $v_i$  and  $v_j$ . Fig. 1A–C demonstrates the decomposition of streamlines encoded in a connectivity matrix and the half-incidence matrix representations. Mathematically, the symmetric connectivity matrix is decomposed as follows:

$$A = UV^T + VU^T \quad (1)$$

Since the columns of the half-incidence matrices each represent a single endpoint associated with a spatial coordinate, a conventional spatial smoothing kernel can be applied to those columns, resulting in a pair of smoothed half-incidence matrices  $U_s$  and  $V_s$ . As previously derived [32], a smoothed connectivity matrix can be constructed by combining the smoothed half-incidence matrices as follows:

$$A_s = U_s V_s^T + V_s U_s^T \quad (2)$$

Here, we propose a simplification of this formulation, which leads to improved computational tractability. Let  $F_s$  denote a spatial smoothing kernel of size  $v \times v$ , such that column  $i$  of  $F_s$  stores the weights for a smoothing kernel spatially centered at the  $i$ th node of the network. This smoothing kernel can be used to compute the smoothed half-incidences:

$$\begin{aligned} U_s &= F_s U \\ V_s &= F_s V \end{aligned} \quad (3)$$

Smoothing can thus be represented as a linear transformation of each half-incidence matrix. Under this simplification, CBS reduces to a matrix congruence between the smoothed and initial connectivity matrices, which can be efficiently computed without using half-incidence matrices. Specifically, we have that:

$$\begin{aligned} A_s &= U_s V_s^T + V_s U_s^T \\ &= F_s U V^T F_s^T + F_s V U^T F_s^T \\ &= F_s A F_s^T \end{aligned} \quad (4)$$

120 This equation shows that the smoothed connectivity  
 121  $A_s$  is a congruent transformation of the initial connectivity  
 122 matrix  $A$ . Fig. 1D-F illustrates a simple example  
 123 of this transformation. This simplification improves  
 124 the computational feasibility since performing  
 125 CBS is no longer dependent on the number of stream-  
 126 lines  $n$  which is typically greater than the number of  
 127 non-zero connectome edges. The precise derivation  
 128 of smoothing kernel matrix  $F_s$  is presented later in  
 129 Section 2.6. **Smoothing parameters.**

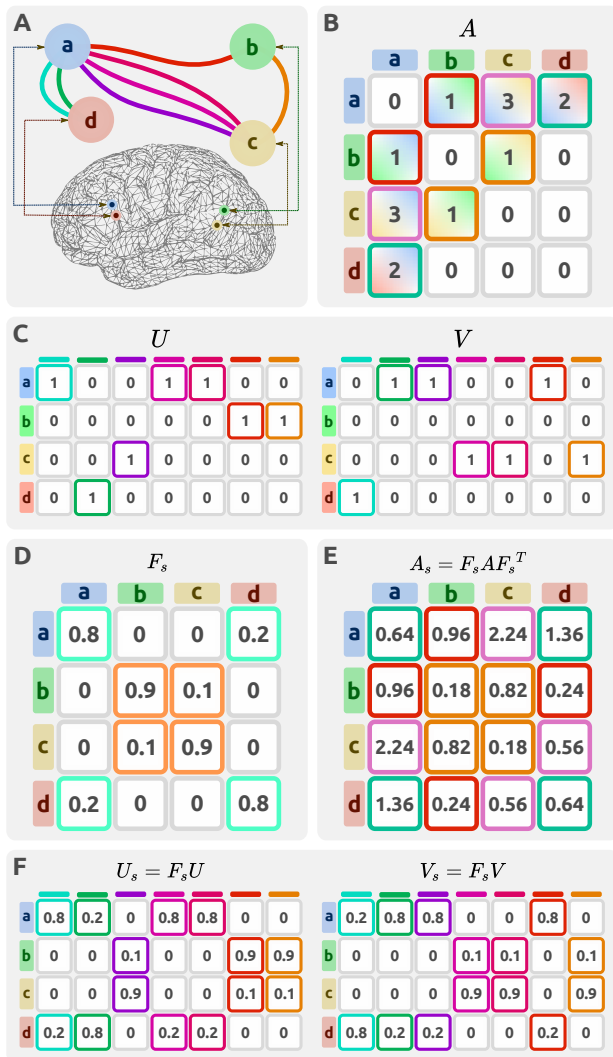

**Fig. 1.** Illustrative example demonstrating the decomposition of streamlines into connectivity and incidence matrices. (A) A hypothetical network in which 7 streamlines connect four brain regions/nodes. The nodes (a,d) and (b,c) are selected to be spatially proximal. (B) Matrix  $A$  encodes the network in a 4x4 connectivity matrix. (C) The network can be alternatively represented by two half-incidence matrices  $U$  and  $V$ . (D) A connectome smoothing kernel  $F_s$  can be defined based on the pairwise geodesic distances between nodes. (E,F) The network representations can be spatially smoothed using CBS to produce a smoothed connectivity matrix  $A_s$  or a pair of smoothed half incidence matrices  $U_s, V_s$ .

## 130 2.2. Study design

131 We investigated the impact of CBS on connectomes  
 132 mapped at different node resolutions. As detailed  
 133 below, high-resolution ( 60k nodes) and atlas-based  
 134 ( 300 nodes) connectomes were mapped for individu-  
 135 als using diffusion MRI and established whole-brain

136 tractography methods. Data from two diffusion MRI  
 137 acquisitions for each individual were used, enabling  
 138 evaluation of test-retest reliability and identifiability  
 139 across different smoothing parameters. Fig. 2  
 140 provides a brief overview of the study design. We next  
 141 describe the diffusion MRI acquisition, whole-brain  
 142 tractography and connectome mapping procedures,  
 143 smoothing parameters, and the evaluation methodol-  
 144 ogy used in this study.

## 145 2.3. Imaging data acquisition and pre- 146 processing

147 Imaging data were sourced from the Human Connec-  
 148 tome Project (HCP) [39, 40]. We obtained the diffu-  
 149 sion and structural MRI images from the 42 healthy  
 150 young adults comprising the HCP test-retest cohort.  
 151 For these individuals, two separate imaging sessions  
 152 were conducted across two different days, with the  
 153 intervening period between the test and retest scans  
 154 ranging from 18 to 343 days. These duplicate individ-  
 155 ual scans enabled the assessment of both intra- and  
 156 inter-individual variations in the mapped connectiv-  
 157 ity information. Diffusion MRI data were acquired  
 158 using a 2D spin-echo single-shot multiband EPI se-  
 159 quence with a multi-band factor of 3 and monopolar  
 160 diffusion sensitization. The diffusion data consisted  
 161 of three shells (b-values: 1000, 2000, 3000  $s/mm^2$ )  
 162 and 270 diffusion directions equally distributed within  
 163 the shells, and 18 b=0 volumes, with an isotropic  
 164 spatial resolution of 1.25mm [41]. We analyzed  
 165 preprocessed diffusion data, where preprocessing  
 166 was completed by the HCP team, using an estab-  
 167 lished minimal preprocessing pipeline (v3.19.0).  
 168 This included b=0 intensity normalization across  
 169 scanning sessions, EPI and eddy-current-induced  
 170 distortion corrections, motion correction, gradient  
 171 nonlinearity correction, registration to native  
 172 structural space, and masking the final data with  
 a brain mask [42].

## 173 2.4. Connectome resolution

174 We mapped both high-resolution and atlas-based  
 175 connectomes to evaluate the impact of CBS on differ-  
 176 ent parcellation granularities. All high-resolution  
 177 connectomes were mapped on the fsLR-32k standard  
 178 surface mesh, comprising 32,492 vertices on each  
 179 hemisphere [43]. This space is recommended for  
 180 high-resolution cross-subject studies of diffusion  
 181 MRI as it provides an accurate representation of  
 182 the cortical surface with fewer vertices than the  
 183 native mesh [42]. The combined left and right  
 184 cortical surfaces consisted of 59,412 vertices after  
 185 exclusion of the medial wall. The high-resolution  
 186 maps were downsampled to a lower spatial resolu-  
 187 tion defined by the HCP-MMP1.0 atlas comprising  
 188 360 cortical regions [44]. The downsampling  
 189 procedure is detailed in the Section 2.7. **CBS  
 190 for atlas-based connectivity.** In brief, the high-  
 191 resolution connectivity matrix was aggregated  
 192 across all vertices belonging to each atlas region  
 such that the connectivity weight between two

193 atlas nodes was equal to the sum of the connectivity  
 194 weights over all high-resolution vertices connecting  
 195 those atlas nodes. The subcortex was not included in  
 196 either high-resolution or atlas-based connectomes.

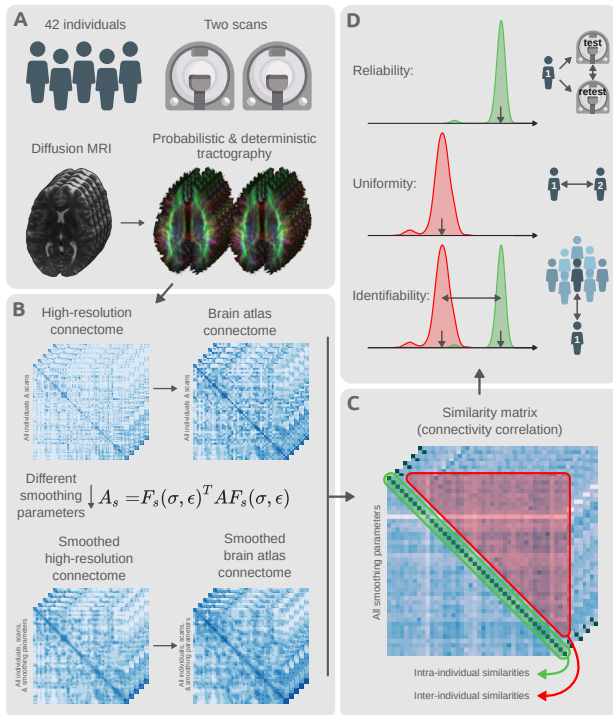

**Fig. 2.** Schema of study design and methodology. (A) Test-retest diffusion MRI scans of 42 individuals were sourced from the Human Connectome Project. This provided a duplicate scan of every individual. Probabilistic and deterministic tractography were utilized to estimate whole-brain white matter fiber trajectories for all individuals and scans. (B) Tractography results were used to map unsmoothed structural connectomes using the high-resolution fsLR-32k surface mesh. Different smoothing parameters were used to transform the unsmoothed high-resolution connectomes into various CBS smoothed alternatives. All variants of smoothed and unsmoothed connectomes were also downsampled to connectivity maps on the HCP-MMP1.0 brain atlas comprising 360 cortical regions [44]. (C) All mapped connectomes were used to evaluate the level of similarity between connectivity maps of different scans (test and retest) for each combination of parcellation resolution and set of smoothing parameters. Both intra- and inter-individual similarities were computed for all pairs of scans. (D) The computed similarities were used to evaluate the level of connectome reliability, uniformity, and identifiability: reliability quantifies the average similarity of connectomes belonging to scans of the same individual; uniformity quantifies the average conformity of connectomes belonging to different individuals; identifiability measures the extent to which scans of the same individuals are differentiable from the rest of the group.

## 197 2.5. Tractography & connectome construction procedure

198  
 199 The impact of CBS was evaluated on both probabilistic  
 200 and deterministic tractography algorithms. MR-  
 201 trix3 software was used to perform tractography [45].  
 202 An unsupervised method was used to estimate the  
 203 white-matter (WM), grey-matter (GM), and cerebrospinal  
 204 fluid (CSF) response functions [46] for spherical  
 205 deconvolution [47]. The fiber orientation distribution  
 206 (FOD) in each voxel was estimated using a Multi-  
 207 Shell, Multi-Tissue Constrained (MSMT) spherical  
 208 deconvolution, which improves tractography at tissue  
 209 interfaces [48]. The fsLR-32k surface mesh was  
 210 used to generate a binary voxel mask at the interface

211 between WM and cortical GM, from within which  
 212 tractography streamlines were uniformly seeded at  
 213 random coordinates from within this ribbon. Probabilistic  
 214 tractography was performed by 2nd-order integration  
 215 over fiber orientation distributions (iFOD2) [49].  
 216 Deterministic tractography was performed using a  
 217 deterministic algorithm that utilized the estimated  
 218 FOD with a Newton optimization approach to locate  
 219 the orientation of the nearest FOD amplitude peak  
 220 from the streamline tangent orientation (“SD\_Stream”) [50].  
 221 Five million streamlines were generated for each  
 222 tractography method for each scan.

223  
 224 A streamlines propagation mask was generated using  
 225 the intersection of voxels with non-zero white matter  
 226 partial volume as estimated by FSL FAST [51] and  
 227 voxels with non-zero sub-cortical grey matter volume  
 228 as estimated by FSL FIRST [52]. The sub-cortical  
 229 GM was included in the propagation mask to preserve  
 230 long streamlines relaying through the sub-cortex,  
 231 only terminating streamlines at the boundaries of  
 232 cortical GM or CSF. The streamline endpoints were  
 233 then mapped to the closest vertex of the individual’s  
 234 WM surface mesh (fsLR-32k). Streamlines ending  
 235 far from the cortical vertices ( $>2\text{mm}$ ) were  
 236 discarded. The remaining streamlines were used to  
 237 generate a  $59,412 \times 59,412$  high-resolution connectivity  
 238 matrix for each of the two sessions for each individual.  
 239 These data form the input for evaluation of CBS as  
 240 described in the following sub-sections.

## 241 2.6. Smoothing parameters

242 The matrix of spatial smoothing kernels,  $F_s$ , determines  
 243 the spatial distribution of smoothing weights. We use  
 244 a Gaussian function to define kernel weights,  $G(\delta)$ ,  
 245 as a function of distance from the kernel center,  $\delta$ ,  
 246 as given by:

$$G(\delta) = \frac{1}{(\sqrt{2\pi}\sigma)^k} e^{-\frac{\delta^2}{2\sigma^2}} \quad (5)$$

247 Where  $k$  is the dimension of the spatial kernel. The  
 248 parameter  $\sigma$  is the standard deviation of the Gaussian  
 249 distribution which determines the strength of  
 250 smoothing. In this study, smoothing was applied to  
 251 the cortical surface mesh ( $k = 2$ ) and was quantified  
 252 by the geodesic distance over the surface mesh. Despite  
 253 each subject possessing the same set of vertices, the  
 254 smoothing kernel was computed separately for each  
 255 scan, based on the precise inter-vertex geodesic  
 256 distances on the white-matter surface mesh of each  
 257 individual scan.

258 To compare the impact of different kernel standard  
 259 deviations, smoothing kernels were computed with 1,  
 260 2, 3, 4, 6, 8, and 10mm FWHM (full width at half  
 261 maximum) ( $\text{FWHM} = \sigma\sqrt{8\ln 2}$ ).

262 A second parameter that can impact smoothing is  
 263 *truncation* of the kernel. As the Gaussian distribution  
 264 decays exponentially with distance, the kernel is  
 265 effectively zero for sufficiently large distances, and  
 266 so contributions can be ignored with minimal loss of

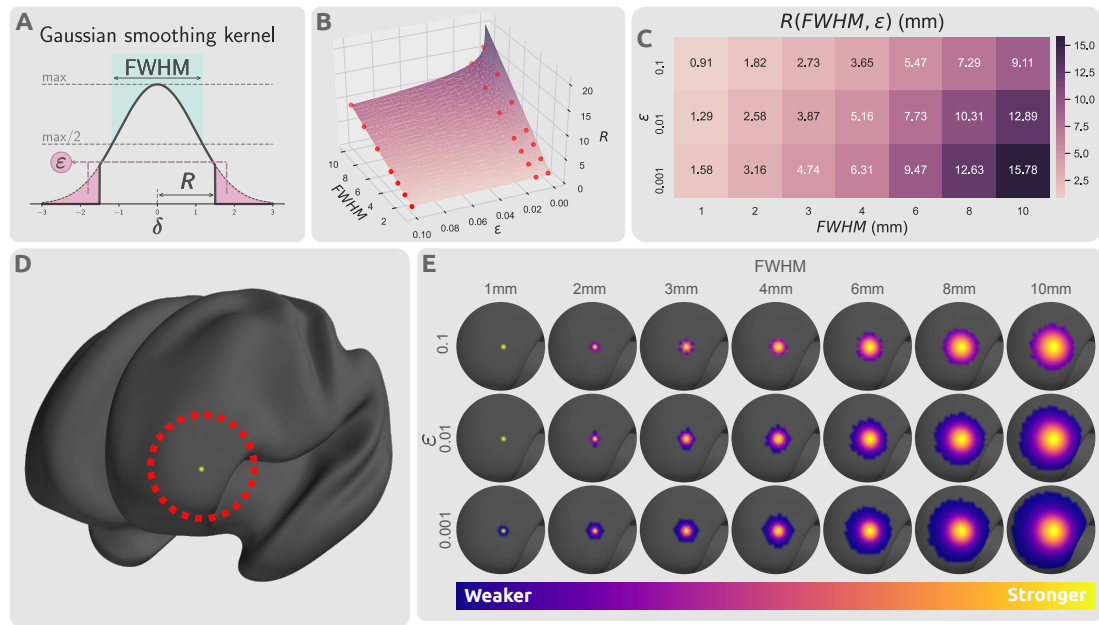

**Fig. 3.** Impact of kernel parameters on truncated kernels. (A) Distribution of a truncated Gaussian kernel with smoothing parameters FWHM,  $\epsilon$ , and  $R(\text{FWHM}, \epsilon)$ . FWHM determines the standard deviation of the Gaussian kernel,  $\epsilon$  dictates the proportion of the kernel that is truncated, and  $R$  determines the threshold radius beyond which the kernel is set to zero. The thick black line represents the smoothing kernel as a function of the smoothing parameters. (B) Smoothing parameter space of FWHM,  $\epsilon$ , and  $R$ . The parameter space plane shows the value of smoothing kernel radius  $R$  as a function of kernel standard deviation, FWHM, and truncation threshold,  $\epsilon$ . The radius is linearly related with FWHM, but log-linearly with the inverse of  $\epsilon$ . The red points indicate the selected smoothing parameters from the parameter space that were used in this study. (C) The values of kernel truncation radius at the respective smoothing parameters selected for FWHM and  $\epsilon$ . (D) A sample cortical vertex in the left frontal lobe of an inflated cortical mesh. (E) The respective column of the smoothing kernel  $F_s$  for the vertex shown in panel (D) with different smoothing parameter choices projected on the cortical surface.

267 precision. Truncation results in a sparse smoothing  
 268 kernel, enabling computationally efficient smoothing  
 269 of high-resolution connectomes. Here we studied the  
 270 effect of the truncation threshold,  $\epsilon$ , which is defined  
 271 as the fraction of the kernel integral discarded as a re-  
 272 sult of kernel truncation (Fig. 3A): for each value of  
 273 FWHM, we generated three kernels for assessment,  
 274 corresponding to  $\epsilon = \{0.1, 0.01, 0.001\}$ . This trun-  
 275 cation can alternatively be expressed as a kernel ra-  
 276 dius  $R$  (which has benefits both conceptually and pro-  
 277 grammatically):

$$R(\text{FWHM}, \epsilon) = \text{FWHM} \sqrt{-\log_2 \epsilon} \quad (6)$$

278 Proof of this relationship is provided in the Sup-  
 279 plementary Information Section S.1. **Thresholding ra-  
 280 dius.**

281 Fig. 3A shows the influence of FWHM and  $\epsilon$  on  
 282 the truncated kernel. Fig. 3B,C show the relation-  
 283 ship between standard deviation, truncation thresh-  
 284 old and radius. Truncated kernels were generated  
 285 with nonzero kernel weights only at locations with  
 286 distance less than  $R(\text{FWHM}, \epsilon)$  from the kernel cen-  
 287 ter. Consequently, kernels were re-normalized such  
 288 that for every vertex the column sum of  $F_s$  was 1.0  
 289 despite truncation. Fig. 3D,E demonstrate the spatial  
 290 distribution of a single row of this smoothing kernel  
 291 over a sample cortical surface mesh.

## 292 2.7. CBS for atlas-based connectivity

293 As described in Section 2.4. **Connectome resolu-  
 294 tion**, smoothed versions of the parcellation-based

295 atlas-resolution connectome can be computed by  
 296 first applying smoothing to the high-resolution con-  
 297 nectome, then aggregating the connectivity values  
 298 within the vertices corresponding to each atlas par-  
 299 cel. This approach however necessitates the high stor-  
 300 age and computational complexity demands of high-  
 301 resolution connectome data. We therefore derived a  
 302 more computationally efficient procedure to perform  
 303 CBS on atlas-based connectomes.

304 A brain parcellation atlas can be denoted by a bi-  
 305 nary  $p \times v$  matrix  $P$ , where  $p$  is the number of brain  
 306 regions in the atlas, such that the  $i$ th row of  $P$  is a  
 307 binary mask of vertices belonging to the  $i$ th atlas re-  
 308 gion and each vertex belongs to at most one region  
 309 (a “hard parcellation”). An atlas-based connectivity  
 310 map  $A_p$  can be represented by the matrix multiplica-  
 311 tion  $A_p = PAP^T$ : this operation reduces the  $v \times v$   
 312 high-resolution connectivity  $A$  to a  $p \times p$  atlas  
 313 connectivity map  $A_p$ . To smooth  $A_p$ , the high-resolution  
 314 connectivity matrix  $A$  can be smoothed to  $A_s$  and  
 315 then downsampled to create the smoothed atlas con-  
 316 nectivity map  $A_{sp}$ . An equivalent approach is to first  
 317 spatially smooth every row of the brain atlas  $P$ , and  
 318 then normalize every column to produce a smoothed  
 319 “soft parcellation”  $P_s = PF_s$ , where each region is  
 320 now defined as a weighted probability map across ver-  
 321 tices and vertices can have non-zero membership to  
 322 multiple regions. This enables direct computation of  
 323 smoothed parcellation-based connectome matrix  $A_{sp}$   
 324 without necessitating computation of the smoothed  
 325 high-resolution connectome matrix  $A_s$  (see Supple-  
 326 mentary Information Section S.2. **CBS for atlas-based  
 327 connectivity** for detail):

$$\begin{aligned}
 A_{sp} &= PA_s P^T \\
 &= PF_s A F_s^T P^T \\
 &= (PF_s) A (PF_s)^T \\
 &= P_s A P_s^T
 \end{aligned} \tag{7}$$

## 2.8. Connectome similarity

To evaluate the potential advantages of smoothing, a measure of similarity based on Pearson's correlation was used to quantify the conformity of two connectivity maps [32, 53]. To compute the similarity between two networks  $A_1$  and  $A_2$ , first, Pearson's correlation was computed for all respective rows of the connectivity matrices, yielding  $v$  correlation coefficients, each indicating the connectivity similarity of a single node; these correlations were then averaged over all nodes to produce a single value indicating the similarity of two connectomes. This measure was used to quantify both intra- and inter-individual connectome matrix similarities.

## 2.9. Evaluation metrics

Direct connectome comparisons were performed within each combination of: tractography algorithm (deterministic and probabilistic); parcellation resolution; and network smoothing parameters. Within each of these configurations, smoothed structural connectomes were generated independently for the two scanning sessions for each of 42 participants. For each scan in session 1, its similarity to every session 2 scan (1 intra-individual and 41 inter-individual) was computed; aggregated across all individuals, this process yielded 42 values comparing connectomes of the same individual (intra-individual similarities), and  $42 \times 41$  measuring the similarity between connectomes of different individuals (inter-individual similarities). The intra-individual similarities were averaged to form a measure of connectome reliability  $\mu_{intra}$ , indicating the extent of consistency of mapped connectomes for an individual; similarly, the inter-individual similarities were averaged to yield a measure of population uniformity of the connectivity maps  $\mu_{inter}$ . Ideally, connectomes should be reliable (i.e. high  $\mu_{intra}$ ) and preserve inter-individual differences (i.e. low  $\mu_{inter}$ ). Hence, high reliability and low population uniformity is desirable.

To evaluate the extent to which an individual's connectome is unique, we adopted an established identifiability framework [54]. *Identifiability* quantifies the extent to which an individual can be differentiated from a larger group based on a set of individual attributes. Here, identifiability was measured by the effect size of the difference in the means of intra-individual and inter-individual similarities [32]:

$$\text{identifiability} = \frac{|\mu_{intra} - \mu_{inter}|}{s} \tag{8}$$

Where  $\mu_{intra}$  and  $\mu_{inter}$  are the mean of the two intra- and inter-individual similarity distributions and  $s$  is the pooled standard deviation of the two distributions.

## 2.10. Evaluating statistical power with atlas-resolution smoothing

Generally, smoothing can result in a loss of effective spatial resolution, blurring, and shifting or merging of adjacent signal peaks [55–58], but is necessary to strike a compromise between sensitivity and specificity [59]. Hence, we investigated the impact of CBS on mass univariate significance testing of associations between cognitive performance and atlas-based structural connectivity. Given that structural connectivity and cognition are known to be associated [32], we tested whether the use of CBS would improve power to detect such associations. For each pair of regions in the parcellation atlas, Pearson's correlation coefficient was used to test for an association between connectivity strength and a previously established measure of overall cognitive performance [60]. This yielded a correlation coefficient for each pair of regions. Age and sex were regressed out from the cognitive measure as confounds. This was repeated across 100 bootstrap tests each including 90% of the sample ( $N=35$ ) to increase the robustness of the comparisons against individual effects.

To generate a distribution of correlation coefficients under the null hypothesis of an absence of association between connectivity and cognitive performance, we randomized cognitive scores between individuals and recomputed all correlation coefficients; this was repeated for 1000 randomizations (10 randomizations within each bootstrap sample), yielding 1000 correlation coefficients representing the null distribution for

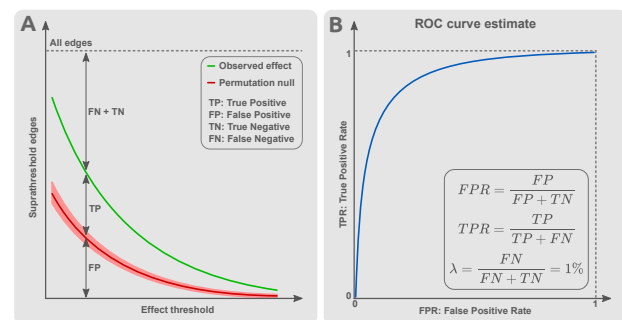

**Fig. 4.** Estimation of receiver operating characteristic (ROC) curves for mass univariate testing of associations between cognitive performance and structural connectivity. For each pair of regions in the parcellation atlas, Pearson's correlation coefficient was used to test for an association between connectivity strength and a previously established measure of overall cognitive performance. (A) For a given effect size threshold (horizontal axis), the number of suprathreshold connections (vertical axis) yielded the combined number of true positives ( $TP$ ) and false positives ( $FP$ ), indicated by the green line. The red line indicates the total number of  $FP$ , determined by randomizing cognitive scores between individuals and recomputing all correlation coefficients (1000 randomizations; mean & 95% confidence interval shown). (B) Assuming a constant value for the false omission rate ( $\lambda = \frac{FN}{FN+TN} = 0.01$ ), an ROC curve can be estimated for different effect size (correlation coefficient) thresholds. TPR: true positive rate. FPR: false positive rate.

each connection. For a range of correlation coefficient thresholds from 0.1 to 0.5 (which indicate small to large effects according to Cohen’s conventions [61]), we counted the number of suprathreshold connections in both the empirical and randomized data (averaged across the 1,000 randomizations).

From these data, we generated an ROC (Receiver Operator Characteristic) curve as follows. The number of suprathreshold connections in the empirical data was assumed to give the combined number of true positives ( $TP$ ) and false positives ( $FP$ ), while the average total number of suprathreshold connections in the randomized data estimated the total number of  $FP$  (Fig. 4A). The combined number of false negatives ( $FN$ ) and true negatives ( $TN$ ) was determined by subtracting  $TP+FP$  from the total number of connections. Finally, since the true underlying effect was unknown, we assumed a false omission rate of 1%, i.e.,  $\lambda = \frac{FN}{FN+TN} = 0.01$ . This assumption enabled estimation of sensitivity ( $\frac{TP}{TP+FN}$ ) and specificity ( $\frac{TN}{TN+FP}$ ) that were used to generate the ROC curve. We ensured that our estimates were robust to the choice of  $\lambda$  (see Supplementary Information Section S.3. Replication of ROC curve estimates for detail). This process was repeated independently for various smoothing kernels, and for data generated using both deterministic and probabilistic tractography algorithms, to investigate the impact of CBS on the statistical power to detect associations between cognitive performance and connectivity.

Additionally, we tested the replicability of the suprathreshold effects in a test-retest comparison to evaluate the replicability of the observations before and after smoothing. At each utilized threshold value, for every edge that was suprathreshold in the data from either session 1 or session 2, we calculated the difference in correlation coefficient between the two sessions. This provided a distribution of effect differences observed across a range of effect thresh-

olds. Thus, a lower average effect difference indicated higher consistency of the connectivity-behavior observations and higher replicability of the findings.

### 3. Results

We investigated the utility of CBS for high-resolution and atlas-based connectomes, focusing on connectome reliability and identifiability as well as computational and storage requirements. We recommend optimal smoothing kernels for connectomes mapped with deterministic and probabilistic tractography, and we demonstrate that smoothing improves the statistical power to detect associations between connectivity and cognitive performance.

#### 3.1. High-resolution connectome storage size

High-resolution connectomes require considerable storage and computational resources, and CBS can increase this burden, due to reductions in matrix sparsity. Fig. 5 summarizes the sizes of stored connectomes for various kernels. Kernels with larger FWHM and/or more lenient truncation thresholds incur greater storage demands for high-resolution connectomes. We found that the kernel radius  $R(\text{FWHM}, \epsilon)$ , which is dependent on both parameters, was a reasonable predictor of connectome size. We also observed that connectomes mapped using probabilistic tractography were approximately an order of magnitude larger than their deterministic counterparts both prior to smoothing (10MB for probabilistic and 1MB for deterministic) and after performing CBS with identical smoothing parameters.

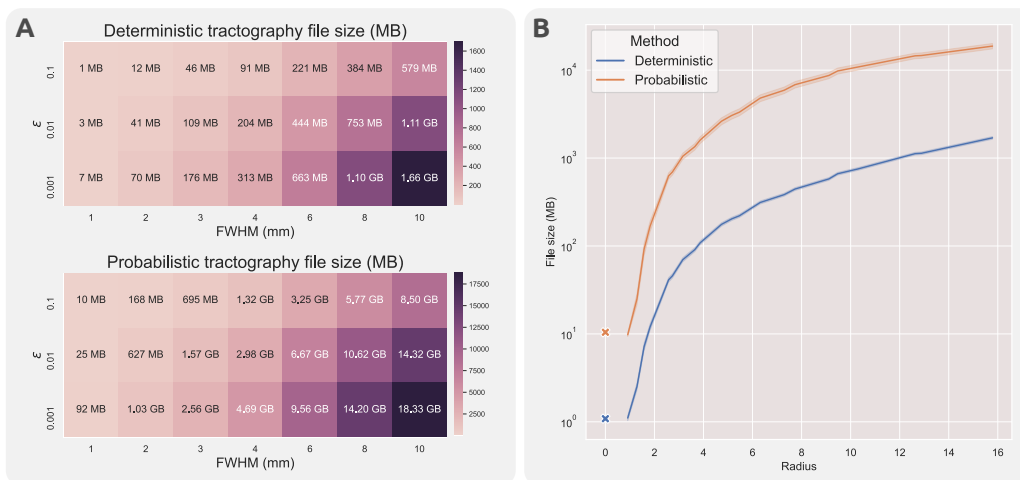

**Fig. 5.** Impact of CBS on connectome storage requirements. (A) Tables show the mean storage size of individual connectomes mapped using deterministic (upper) and probabilistic (lower) tractography following smoothing, as a function of truncation threshold and full-width at half maximum (FWHM) of smoothing kernel (B) The relationship between the kernel radius and file size of individual connectomes. Results for connectomes with no smoothing are marked with an x. File sizes are plotted using a logarithmic scale. Shaded bands indicate one standard deviation from the mean.

### 3.2. Identifiability and reliability

Fig. 6 summarizes the impact of CBS on the identifiability and reliability of high-resolution structural connectivity maps. We observed that both larger FWHM values and smaller truncation thresholds (i.e., larger  $R$  in both cases) consistently improved connectome reliability (mean intra-subject similarity). While high-resolution connectomes without smoothing had a relatively low reliability ( $\mu_{intra} < 0.2$ ), CBS with kernels as little as 3-4mm FWHM resulted in a substantial increase in reliability ( $\mu_{intra} > 0.5$ ), with reliability exceeding 90% ( $\mu_{intra} > 0.9$ ) achieved in some scenarios.

CBS also impacted connectome identifiability. We observed that while CBS with a 2-4mm FWHM kernel improved the identifiability of connectomes, CBS with larger FWHM was detrimental for individual identifiability, such that CBS with a 10mm FWHM resulted in more than 50% reduction in identifiability. For both identifiability and reliability measures, CBS was more sensitive to a change in kernel FWHM in contrast to the truncation threshold  $\varepsilon$ . Increasing the truncation threshold from  $\varepsilon = 0.01$  to  $\varepsilon = 0.001$  had negligible impact on either measure.

Tractography algorithm choice also impacted reliability and identifiability. High-resolution connectomes mapped using deterministic tractography had relatively lower reliability (10-20% lower), but higher identifiability (20-30%), compared to their probabilistic counterparts with identical CBS parameters.

Fig. 7 shows the impacts of CBS with different ker-

nel parameters on an atlas-parcellation-based structural connectome. In agreement with the high-resolution analyses, we observed both that increases in FWHM and decreases in kernel truncation thresholds led to improved connectome reliability, and that this improvement in reliability comes at the expense of reduced identifiability. Without CBS, the atlas-based connectomes were already relatively reliable (deterministic: 92%, probabilistic: 98%). Use of the largest smoothing kernel increased these to 97% and 99%, respectively, albeit at the cost of a small reduction in identifiability (from 7.8 to 7.2 for deterministic and from 6.8 to 6.1 for probabilistic). Changing kernel extent from  $\varepsilon = 0.01$  to  $\varepsilon = 0.001$  again had no considerable impact on reliability or identifiability. The magnitude of influence of CBS on the atlas-resolution connectomes was comparatively smaller than the effects observed at the higher resolution.

All in all, we observed that the advantages of CBS for high-resolution were maximized with 3-6mm FWHM kernels; larger smoothing kernels (>6mm FWHM) could deteriorate high-resolution identifiability for the sake of reliability. In contrast, identifiability of the atlas-resolution maps were less sensitive to larger smoothing kernels, and thus kernels of 6-10mm FWHM can be used to improve reliability with proportionally smaller losses in identifiability. To achieve similar reliability and identifiability, connectomes generated using deterministic tractography were found to require CBS with larger smoothing kernels compared to their probabilistic counterparts.

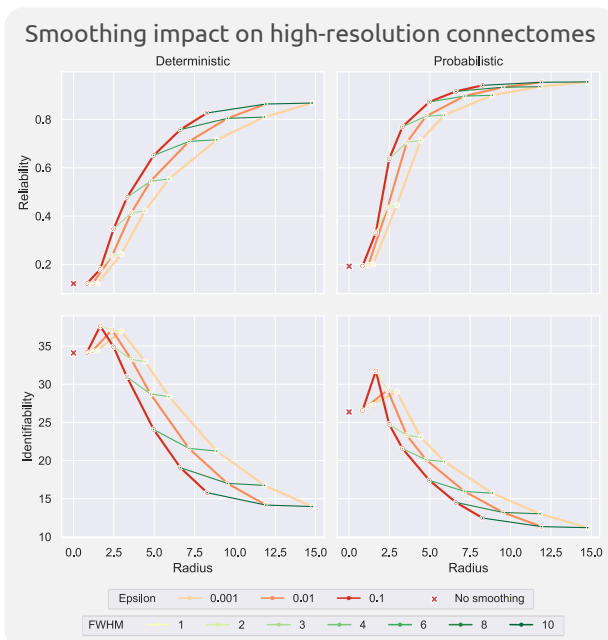

**Fig. 6.** Impact of CBS on high-resolution connectomes for a range of different kernel parameters. Reliability (first row) and identifiability (second row) are reported for deterministic (left column) and probabilistic (right column) structural connectomes mapped at the resolution of cortical vertices. Results for connectomes with no smoothing are marked with an x in each plot. Kernel truncation thresholds,  $\varepsilon$ , are colored using warm colors such that each line connects points with equal  $\varepsilon$ ; similarly, FWHM is colored using shades of green.

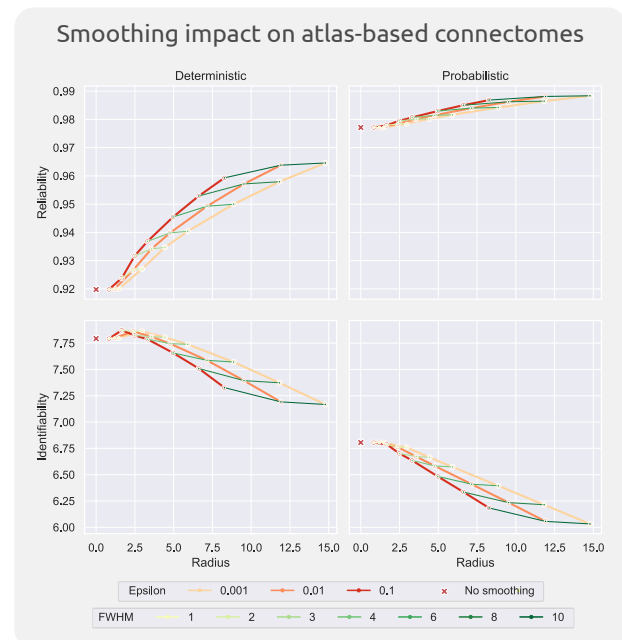

**Fig. 7.** Impact of CBS on atlas-based connectomes, for a range of different kernel parameters. The connectome reliability (first row) and identifiability (second row) are reported for deterministic (left column) and probabilistic (right column) structural connectomes mapped at the resolution of atlas parcels. The unsmoothed atlas-based connectivity results are marked with x in each plot. Kernel truncation thresholds,  $\varepsilon$ , are colored using warm colors such that each line connects points with equal  $\varepsilon$ ; similarly FWHM is colored using shades of green.



543 Finally, it should be noted that the optimal CBS kernel  
 544 parameters essentially depend on the application  
 545 for which the connectome will be used.

### 546 3.2.1. Case Study: Impact of CBS on statistical 547 power

548 Finally, we investigated whether CBS can improve  
 549 statistical power to detect associations between struc-  
 550 tural connectivity and cognitive performance. For  
 551 this study we used  $\text{FWHM} = 8\text{mm}$  and  $\varepsilon = 0.01$ ,  
 552 based on the results reported above. For this case  
 553 study, we considered the mapped atlas-based connec-  
 554 tomes and computed Pearson's correlation coefficient  
 555 between streamline counts and cognitive performance  
 556 for each pair of regions. ROC curves were then com-  
 557 puted for each case, as described in the Methods, to  
 558 determine whether CBS improved statistical power to  
 559 identify associations between connectivity and cog-  
 560 nitive performance.

561 First, we tested whether the magnitude of effect  
 562 in the set of suprathreshold connections (i.e., connec-  
 563 tions with a correlation coefficient exceeding a fixed  
 564 threshold) were replicable between the test and retest  
 565 datasets. We found that CBS improved replicability  
 566 in suprathreshold connections, particularly more so  
 567 for connectomes mapped with probabilistic tractog-  
 568 raphy (Fig. 8A); this suggests that CBS can improve  
 569 the reproducibility of mass univariate testing on con-  
 570 nectomes.

571 Next, we enumerated the number of suprathresh-  
 572 old connections as a function of the effect thresh-  
 573 old (Fig. 8B). While the proportion of suprathresh-  
 574 old connections increases following smoothing for the

empirical data, indicating a potential gain in sensi- 575  
 tivity, a similar increase in the randomized (null 576  
 distribution) data suggests that this may come at 577  
 the expense of poorer specificity. For connectomes 578  
 mapped with deterministic tractography, the num- 579  
 bers of suprathreshold connections for the empiri- 580  
 cal and randomized data are separated by a compar- 581  
 able gap, irrespective of whether CBS was per- 582  
 formed. For probabilistic tractography, the num- 583  
 ber of suprathreshold connections for the randomized 584  
 data was comparable with and without smoothing, 585  
 whereas CBS resulted in a substantially greater pro- 586  
 portion of suprathreshold connections for the empiri- 587  
 cal data. This suggests that CBS can improve the 588  
 statistical power of mass univariate testing per- 589  
 formed on connectomes mapped with probabilistic 590  
 tractography, without a substantial loss in specificity. 591

To further investigate these effects, we consid- 592  
 ered precision ( $\frac{TP}{TP+FP}$ ) as a function of effect size 593  
 threshold (Fig. 8C); and from this, generated ROC 594  
 curves (Fig. 8D). Performing CBS on connectomes 595  
 mapped from probabilistic tractography improves the 596  
 precision and sensitivity of the inference. This im- 597  
 provement is also partially observed for connectomes 598  
 mapped from deterministic tractography only for 599  
 smaller effect thresholds ( $r < 0.3$ ). Taken together, 600  
 these results suggest that CBS is particularly bene- 601  
 ficial to improving the statistical power of inference 602  
 performed on connectomes mapped with probabilistic 603  
 tractography; in contrast, for connectomes mapped 604  
 with deterministic tractography, the benefit of CBS 605  
 is marginal and possibly detrimental for larger effect 606  
 size thresholds ( $r > 0.3$ ). More importantly, CBS 607  
 improved replicability with minimal impact on the 608

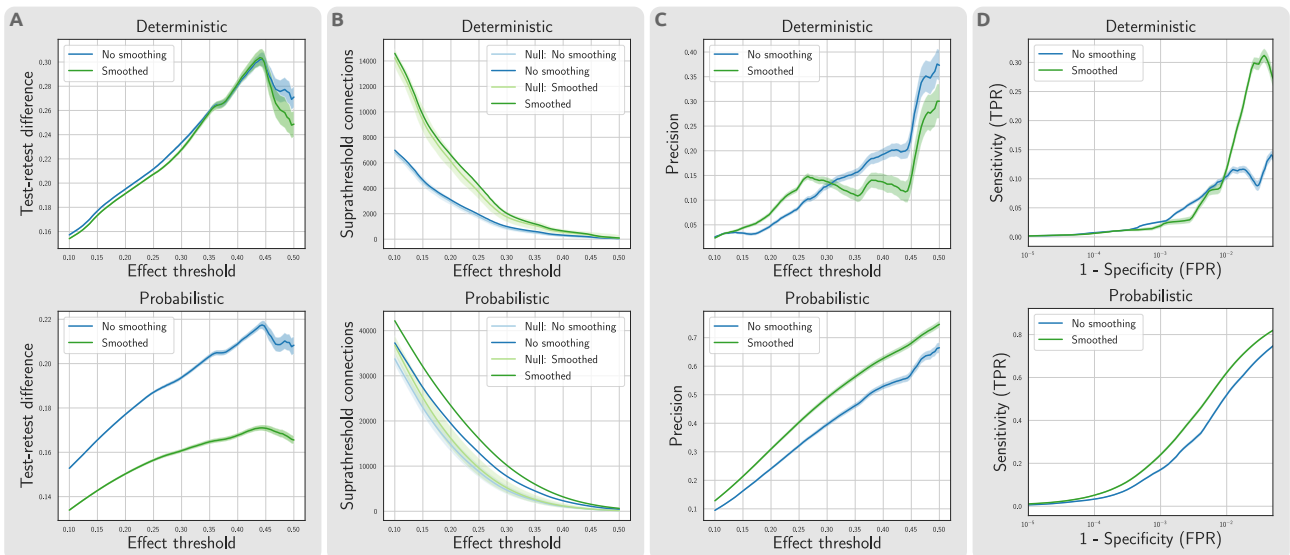

**Fig. 8.** Impact of CBS on statistical power of mass univariate testing on atlas-based connectomes, based on an exemplar dataset examining correlations between structural connectivity and cognitive performance. (A) Replicability of suprathreshold connections between test and retest datasets: a lower difference of the observed effect magnitude between test and retest is favorable in terms of replicability. (B) The number of suprathreshold connections as a function of the effect size threshold was compared with a null distribution from permutation. To assess the predictive utility of the connectomes, precision, sensitivity, and specificity was estimated from a comparison with the null. (C) Precision was calculated from the ratio of supra-threshold edges found in empirical data compared to the null model at different effect thresholds. (D) ROC curves were estimated to demonstrate the respective changes in sensitivity ( $TPR = \frac{TP}{TP+FN}$ ) and specificity ( $1 - FPR = \frac{TN}{TN+FP}$ ) of the edges selected at different effect thresholds. The analyses were repeated across bootstrap samples to provide a robust estimate of statistical power. Shaded lines indicate 95% confidence intervals. Abbreviations: TP: True Positive, FP: False Positive, TN: True Negative, FN: False Negative, TPR: True Positive Rate, FPR: False Positive Rate.

609 statistical power for connectomes mapped with both  
610 tractography algorithms.

## 611 4. Discussion

612 In this study, we established a computationally  
613 efficient formalism for connectome smoothing and  
614 demonstrated that our connectome-based smoothing  
615 (CBS) method can benefit the analysis of atlas-based  
616 and high-resolution connectomes. Our results demon-  
617 strate that CBS impacts different aspects of con-  
618 nectivity mapping analyses, including individual re-  
619 liability, inter-individual variability, and the inter-  
620 scan replicability of brain-behavior statistical asso-  
621 ciations, as well as computational storage demands.  
622 The choice of smoothing kernel parameters involves  
623 a trade-off between connectome sensitivity and speci-  
624 ficity: larger kernels (higher FWHM and lower  $\epsilon$ ) im-  
625 prove connectome sensitivity, but are detrimental to  
626 connectome specificity. It is therefore important to  
627 select a level of smoothing that strikes a balance be-  
628 tween these competing factors. In the following sec-  
629 tions, we provide some guidelines for selecting optimal  
630 smoothing parameters and discuss the implications of  
631 performing CBS for connectome reliability, identifi-  
632 ability, storage requirements, and statistical power.

### 633 4.1. *Appropriate smoothing parameters*

634 Our results indicate that CBS differentially affects  
635 the characteristics of structural connectivity matri-  
636 ces mapped with different tractography methods and  
637 parcellation resolutions. Although we cannot sug-  
638 gest a one-size-fits-all smoothing kernel, our find-  
639 ings can guide selection of appropriate CBS smooth-  
640 ing kernels in future studies. Table 1 provides some  
641 rules of thumb for selecting a level of spatial smooth-  
642 ing which aims to achieve a balance between re-  
643 liability and identifiability, while also considering  
644 storage demands. In general, high-resolution con-  
645 nectomes benefit from smaller FWHM compared to  
646 atlas-based connectomes, and deterministic maps re-  
647 quire larger FWHM than their probabilistic counter-  
648 parts to achieve the same level of reliability. However,  
649 the goals of the analysis at hand must be considered  
650 when selecting the level of smoothing. For example,  
651 if the goal is to identify an individual from a group  
652 based on their connectome, deterministic tractogra-  
653 phy and a smaller FWHM than recommended in Ta-  
654 ble 1 may be desirable. On the other hand, if one  
655 wishes to build a reliable consensus structural con-  
656 nectome that is robustly consistent across individu-  
657 als, a higher FWHM than recommended in Table 1  
658 may be favored. A value of 0.01 is suggested univer-  
659 sally for the kernel truncation threshold  $\epsilon$ , as smaller  
660 thresholds yield negligible impacts on identifiability  
661 and reliability whilst incurring much greater storage  
662 costs.

663 Without CBS, connectomes mapped from deter-  
664 ministic tractography were found to yield higher

665 identifiability; conversely, connectomes mapped from  
666 probabilistic tractography were more reliable. This is  
667 in line with previous reports suggesting that proba-  
668 bilistic tractography achieves higher sensitivity, lower  
669 specificity, and lower interindividual variability, com-  
670 pared to deterministic approaches [62–65]. Given  
671 that many factors other than reliability and identi-  
672 fiability would affect the choice of tractography al-  
673 gorithm, we suggest that CBS could be leveraged to  
674 achieve a balance between reliability and identifiabil-  
675 ity of the selected tractography algorithm. Hence, we  
676 could take advantage of a comparatively larger kernel  
677 for deterministic tractography approaches to match  
678 the reliability and identifiability of the probabilistic  
679 counterpart.

| Recommended<br>smoothing parameters |               | FWHM | $\epsilon$ | $R$  |
|-------------------------------------|---------------|------|------------|------|
| High-<br>resolution                 | Probabilistic | 3mm  | 0.01       | 4mm  |
|                                     | Deterministic | 6mm  | 0.01       | 8mm  |
| Atlas                               | Probabilistic | 8mm  | 0.01       | 10mm |
|                                     | Deterministic | 8mm  | 0.01       | 10mm |

**Table 1.** Recommended smoothing parameters. This table provides rule of thumb recommendations for CBS smoothing kernels of different variants of structural connectomes. In general, connectomes at the resolution of a brain atlas can benefit from larger CBS kernels compared to high-resolution connectomes. High-resolution connectomes computed from probabilistic tractography are advised to be smoothed less than their deterministic counterparts. Reducing epsilon below 0.01 is unfavorable and computationally costly. The rounded values for kernel radius  $R(\text{FWHM}, \epsilon)$  provide sensible approximations.

680 Our results highlight that CBS is a critical step  
681 to improving the reliability of high-resolution connec-  
682 tomes. High-resolution connectivity mapping is particu-  
683 larly sensitive to noise, artefacts, and registration  
684 misalignment, all of which can be alleviated—to a cer-  
685 tain extent—with the new CBS formalism developed  
686 here.

### 687 4.2. *Connectome reliability*

688 Structural connectivity maps are commonly used in  
689 research to draw statistical inferences regarding as-  
690 sociations between brain connectivity and different  
691 aspects of human cognition, behavior, and mental  
692 health [66–71]. The statistical power of such infer-  
693 ences can depend on the reliability of the measure un-  
694 der study: a connectivity measure that can be reliably  
695 assessed for all individuals can potentially improve  
696 the characterization of brain-behavior associations.  
697 However, improvements in reliability achieved by in-  
698 creasing the level of smoothing come at the expense  
699 of poorer spatial specificity and increases in connec-  
700 tome storage and computational requirements. CBS  
701 enables researchers to balance this trade-off to match  
702 the goals of the analysis at hand. Commonly used  
703 atlas-based connectivity maps are comparatively reli-  
704 able, even without any smoothing, since the reduced  
705 spatial resolution of inter-subject correspondence im-  
706 posed by a parcellation performs an operation compa-

707 rable to smoothing. Nevertheless, we found that CBS  
708 could marginally improve the reliability of atlas-based  
709 connectomes.

#### 710 4.3. Individual identifiability

711 The concept of neural fingerprinting has emerged in  
712 recent years which considers the challenge of identi-  
713 fying an individual from within a large group of oth-  
714 ers, based on their connectome or other neuroimaging  
715 data [53]. While the efficacy of a measure at indi-  
716 vidual identification does not necessitate existence of  
717 behavioral and pathological biomarkers in individu-  
718 als, it could still be conceived as an indicator of the  
719 strength of such individual brain-behavior associa-  
720 tions. By reducing the impact of noise and registra-  
721 tion misalignments, CBS can enhance detection of  
722 individual differences in connectivity maps, enabling  
723 clearer differentiation of individuals and thus poten-  
724 tially improve the accuracy of neural fingerprinting.  
725 Our findings suggest that a minimal smoothing ker-  
726 nel of 2mm FWHM improves both reliability and  
727 identifiability of high-resolution connectivity matri-  
728 ces. Implementing CBS with larger kernels (i.e. >  
729 2mm FWHM) further enhances connectome reliabil-  
730 ity substantially, but results in a gradual reduction in  
731 identifiability due to loss of individual identifiers by  
732 spatial blurring. Smoothing the high-resolution con-  
733 nectivity maps beyond 6mm FWHM is unnecessary  
734 because gains in reliability diminish, despite detri-  
735 mental impacts on identifiability, spatial specificity,  
736 and storage requirements.

#### 737 4.4. Storage requirements

738 It is important to consider the storage demands  
739 and associated computational burdens of handling  
740 smoothed connectome data. If the connectome size is  
741 larger than a gigabyte or so, handling the file (loading  
742 into memory and conducting analyses) can become  
743 unacceptably time-consuming. Even with the assis-  
744 tance of high-performance computing infrastructure,  
745 any benefits of using connectomes larger than a few  
746 gigabytes might not outweigh the time and resources  
747 required to process the larger files. This especially  
748 limits the extent of smoothing for connectomes gener-  
749 ated using probabilistic tractography, which can grow  
750 to more than a few gigabytes when smoothed above  
751 4-6mm FWHM. In contrast, connectomes mapped  
752 with deterministic tractography can be smoothed fur-  
753 ther whilst remaining highly computationally feasi-  
754 ble. Nevertheless, if greater smoothing is essential  
755 in a study, a high-performance computing platform  
756 with access to adequate memory can be used to pro-  
757 cess smoothed connectomes (potentially without use  
758 of sparse matrix data structures), which may take  
759 tens of gigabytes of memory per individual connec-  
760 tome.

#### 4.5. Implications on atlas resolution

761 Our results highlight the impact of CBS on structural  
762 connectomes mapped both at the high resolution of  
763 individual surface vertices, and the lower resolution  
764 of a brain atlas. While the findings vary in terms of  
765 magnitude of influence, a common pattern is visible  
766 across resolutions: higher FWHM results in a more  
767 reliable connectome, yet higher FWHM reduces the  
768 identifiability of connectomes. We developed compu-  
769 tationally efficient methods to perform CBS at both  
770 resolutions. Atlas-based connectivity matrices have a  
771 relatively small memory footprint (<1MB), and thus  
772 they can be processed and stored efficiently, regard-  
773 less of the level of smoothing. Similar to the high-  
774 resolution connectomes, when using an atlas par-  
775 cellation, probabilistic and deterministic tractogra-  
776 phy approaches have complementary attributes when  
777 comparing reliability and identifiability: connectomes  
778 mapped from probabilistic tractography achieve bet-  
779 ter reliability compared to their deterministic coun-  
780 terparts, whereas deterministic connectomes can bet-  
781 ter reveal individual differences. This is one possible  
782 factor that can guide the choice between deterministic  
783 and probabilistic tractography algorithms. However,  
784 CBS can be used to increase the reliability of con-  
785 nectomes mapped from deterministic tractography to  
786 match the reliability of the probabilistic approach.  
787

788 Finally, the atlas-based smoothing results suggest  
789 that probabilistic maps are to a certain extent repre-  
790 sentative of highly smoothed deterministic ones. In  
791 other words, more smoothed deterministic maps were  
792 analogous to less smoothed probabilistic maps, as the  
793 probabilistic evaluation curves in Fig. 7 seem to be a  
794 continuation of the deterministic curves. This obser-  
795 vation is in agreement with prior expectations given  
796 the mechanisms used to generate the data, as proba-  
797 bilistic tractography-based connectivity has an intrin-  
798 sic spatial smoothness due to the stochastic variabil-  
799 ity in streamline propagation. The proposed method  
800 to perform CBS on atlas-based connectomes does  
801 not require construction of any intermediate high-  
802 resolution connectomes and is a fast operation rela-  
803 tive to the time required to perform whole-brain trac-  
804 tography. Thus, while the benefits of spatial smooth-  
805 ing for atlas-based connectomes were modest, we re-  
806 commend including CBS in future connectome map-  
807 ping workflows.

#### 4.6. CBS and principals of spatial smoothing

810 Our proposed connectome-based spatial smoothing  
811 approach is an extension of spatial signal smooth-  
812 ing to networks, and hence, fundamental concepts  
813 within the domain of spatial smoothing are applica-  
814 ble to CBS. For instance, from a signal processing  
815 perspective, the matched filter theorem states that  
816 spatial smoothing by an appropriate Gaussian ker-  
817 nel equalizes the voxel-wise standard deviation and,  
818 in turn, yields an optimal sensitivity to detect effects

819 of unknown extent [72, 73]. Additionally, with re- 875  
820 gards to single-subject inference, such smoothing fa- 876  
821 cilitates the application of multiple comparison cor- 877  
822 rection using random field theory [72–74] and finally,  
823 smoothing mitigates residual anatomical variability  
824 of individuals at the group-level. These concepts are  
825 equally applicable to CBS, wherein, a matrix multi-  
826 plication with a smoothing kernel achieves a similar  
827 purpose to convolution of image data with a 3D spa-  
828 tial smoothing kernel; as a result, CBS can be utilized  
829 to (i) maximize connectivity SNR through appropri-  
830 ate filter selection, (ii) improve single-subject infer-  
831 ence, and (iii) improve the reliability of group level  
832 connectivity analyses. This poses an interesting future  
833 research direction to explore the benefits of CBS  
834 for whole-brain high-resolution network inference in  
835 which voxel-wise approaches [31, 74–76] are combined  
836 with network-based approaches [30].

#### 837 4.7. Concluding remarks

838 In this study, we developed a novel formalism for  
839 connectome-based smoothing of structural connectiv-  
840 ity matrices and demonstrated the wide-ranging ben-  
841 efits of connectome smoothing. Our results indicate  
842 that CBS with different kernel FWHMs and trun-  
843 cation thresholds significantly impacts various char-  
844 acteristics of structural connectivity matrices. In  
845 high-resolution connectomes, smoothing up to 3-6mm  
846 FWHM was deemed favorable, though the choice  
847 of smoothing parameters imposes a trade-off be-  
848 tween reliability and individual identifiability. We  
849 provided recommendations for smoothing parameter  
850 choices that achieve a compromise between reliability  
851 and identifiability. Our connectome-based smooth-  
852 ing method and associated recommendations can be  
853 incorporated into future structural connectivity map-  
854 ping pipelines, enabling more reliable and better pow-  
855 ered connectome analyses. Moreover, high-resolution  
856 structural connectivity overcomes the known uncer-  
857 tainty and ambiguity in determination of brain par-  
858 cellation, and so will be a powerful analysis frame-  
859 work moving forward; our demonstrated and evalu-  
860 ated smoothing framework is an essential tool in fa-  
861 cilitating such, and we have made reasonable recom-  
862 mendations for how others can use it.

#### 863 Data and code availability

864 All imaging data used in this study was sourced  
865 from the Human Connectome Project (HCP)  
866 ([www.humanconnectome.org](http://www.humanconnectome.org)). The bash scripts  
867 used to perform tractography using MRtrix3 [45]  
868 ([www.mrtrix.org](http://www.mrtrix.org)), as well as all Python code re-  
869 quired to perform CBS and map smoothed connec-  
870 tomes at either the resolution of vertices or an atlas,  
871 are provided in our git repository. This code  
872 repository can be accessed from [github.com/sinamansour/connectome-based-smoothing](https://github.com/sinamansour/connectome-based-smoothing). Addition-  
873 ally, to facilitate future research, the codes for

smoothing connectomes at high-resolution and atlas-  
resolution will be released as a standalone python  
package (currently under development).

#### Acknowledgments

878 Data were provided by the Human Connectome  
879 Project, WU-Minn Consortium (Principal Invest-  
880 igators: David Van Essen and Kamil Ugurbil;  
881 1U54MH091657) funded by the 16 NIH Institutes  
882 and Centers that support the NIH Blueprint for  
883 Neuroscience Research; and by the McDonnell Cen-  
884 ter for Systems Neuroscience at Washington Univer-  
885 sity. The data analysis was supported by SPAR-  
886 TAN High Performance Computing System at the  
887 University of Melbourne [77], and also supported by  
888 use of the Melbourne Research Cloud (MRC) pro-  
889 viding Infrastructure-as-a-Service (IaaS) cloud com-  
890 puting to the University of Melbourne researchers  
891 through the NeCTAR Research Cloud, a collabora-  
892 tive Australian research platform supported by the  
893 National Collaborative Research Infrastructure Strat-  
894 egy. S.M.L. is funded by a Melbourne Research  
895 Scholarship. R.S. is supported by fellowship funding  
896 from the National Imaging Facility (NIF), an Aus-  
897 tralian Government National Collaborative Research  
898 Infrastructure Strategy (NCRIS) capability. A.Z. was  
899 supported by a senior research fellowship from the  
900 NHMRC (APP1118153).  
901

#### Author contributions

902 **S.M.L.:** Conceptualization, Methodology, Formal  
903 analysis, Data curation, Software, Writing - original  
904 draft, Writing - review & editing **C.S.:** Conceptu-  
905 alization, Writing - original draft, Writing - review  
906 & editing **R.S.:** Conceptualization, Writing - original  
907 draft, Writing - review & editing **A.Z.:** Supervision,  
908 Conceptualization, Writing - original draft, Writing -  
909 review & editing  
910

#### Competing interests

911 The authors declare no competing interests.  
912

#### References

- 913 Poldrack, R. A., Nichols, T. & Mumford, J. 914  
915 Handbook of Functional MRI Data Analysis. 916  
917 *Handbook of Functional MRI Data Analysis*,  
774957 (2011).  
918
- 919 Srinivasan, R. Methods to improve spatial res- 920  
921 olution of EEG. *International journal of bioelec-*  
922 *tromagnetism* **1**, 107–116 (1999).  
923
- 924 Carp, J. The secret lives of experiments: Meth- 925  
926 ods reporting in the fMRI literature. *NeuroIm-*  
927 *age* **63**, 289–300 (2012).  
928

- 924 4. Higashi, H., Tanaka, T. & Tanaka, Y. Smoothing of spatial filter by graph Fourier transform for EEG signals. *2014 Asia-Pacific Signal and Information Processing Association Annual Summit and Conference, APSIPA 2014* (2014). 979
- 925 17. Greve, D. N. *et al.* Cortical surface-based analysis reduces bias and variance in kinetic modeling of brain PET data. *NeuroImage* **92**, 225–236 (2014). 980
- 926 5. Zhang, X., Noah, J. A. & Hirsch, J. Separation of the global and local components in functional near-infrared spectroscopy signals using principal component spatial filtering. *Neurophotonics* **3**, 015004 (2016). 981
- 927 18. Barnes, G. R. & Hillebrand, A. Statistical flattening of MEG beamformer images. *Human Brain Mapping* **18**, 1–12 (2003). 982
- 928 19. Pantazis, D., Nichols, T. E., Baillet, S. & Leahy, R. M. A comparison of random field theory and permutation methods for the statistical analysis of MEG data. *NeuroImage* **25**, 383–394 (2005). 983
- 929 6. Han, X. *et al.* Reliability of MRI-derived measurements of human cerebral cortical thickness: The effects of field strength, scanner upgrade and manufacturer. *NeuroImage* **32**, 180–194 (2006). 984
- 930 20. Kilner, J. M. & Friston, K. J. Topological inference for EEG and MEG. *The Annals of Applied Statistics* **4**, 1272–1290 (Sept. 2010). 985
- 931 7. Franke, K., Ziegler, G., Klöppel, S. & Gaser, C. Estimating the age of healthy subjects from T1-weighted MRI scans using kernel methods: Exploring the influence of various parameters. *NeuroImage* **50**, 883–892 (2010). 986
- 932 8. Valsasina, P. *et al.* Spatial normalization and regional assessment of cord atrophy: Voxel-based analysis of cervical cord 3D T1-weighted images. *American Journal of Neuroradiology* **33**, 2195–2200 (2012). 987
- 933 9. Parrish, T. B., Gitelman, D. R., LaBar, K. S. & Mesulam, M.-M. Impact of signal-to-noise on functional MRI. *Magnetic Resonance in Medicine* **44**, 925–932 (Dec. 2000). 988
- 934 10. Worsley, K. J. Spatial smoothing of autocorrelations to control the degrees of freedom in fMRI analysis. *NeuroImage* **26**, 635–641 (2005). 989
- 935 11. Friston, K. in *Statistical Parametric Mapping* 2006, 10–31 (Elsevier, 2007). 990
- 936 12. Kasper, L. *et al.* Matched-filter acquisition for BOLD fMRI. *NeuroImage* **100**, 145–160 (Oct. 2014). 991
- 937 13. Pajula, J. & Tohka, J. Effects of spatial smoothing on inter-subject correlation based analysis of FMRI. *Magnetic Resonance Imaging* **32**, 1114–1124 (2014). 992
- 938 14. Friston, K., Holmes, A., Poline, J.-B., Price, C. & Frith, C. Detecting Activations in PET and fMRI: Levels of Inference and Power. *NeuroImage* **4**, 223–235 (Dec. 1996). 993
- 939 15. Reimold, M., Slifstein, M., Heinz, A., Mueller-Schauenburg, W. & Bares, R. Effect of spatial smoothing on t-maps: Arguments for going back from t-maps to masked contrast images. *Journal of Cerebral Blood Flow and Metabolism* **26**, 751–759 (2006). 994
- 940 16. Della Rosa, P. A. *et al.* A Standardized [18F]-FDG-PET Template for Spatial Normalization in Statistical Parametric Mapping of Dementia. *Neuroinformatics* **12**, 575–593 (Oct. 2014). 995
- 941 21. Ye, J. C., Tak, S., Jang, K. E., Jung, J. & Jang, J. NIRS-SPM: Statistical parametric mapping for near-infrared spectroscopy. *NeuroImage* **44**, 428–447 (2009). 996
- 942 22. Tak, S., Uga, M., Flandin, G., Dan, I. & Penny, W. D. Sensor space group analysis for fNIRS data. *Journal of Neuroscience Methods* **264**, 103–112 (2016). 997
- 943 23. Cox, R. W. AFNI: Software for analysis and visualization of functional magnetic resonance neuroimages. *Computers and Biomedical Research* **29**, 162–173 (June 1996). 998
- 944 24. Fischl, B. FreeSurfer. *NeuroImage* **62**, 774–781 (Aug. 2012). 999
- 945 25. Jenkinson, M., Beckmann, C. F., Behrens, T. E., Woolrich, M. W. & Smith, S. M. FSL. *NeuroImage* **62**, 782–790 (Aug. 2012). 1000
- 946 26. Friston, K. J. *et al.* Statistical parametric maps in functional imaging: A general linear approach. *Human Brain Mapping* **2**, 189–210 (1994). 1001
- 947 27. Hagmann, P. *et al.* Mapping the Structural Core of Human Cerebral Cortex. *PLoS Biology* **6** (ed Friston, K. J.) e159 (July 2008). 1002
- 948 28. Bullmore, E. & Sporns, O. Complex brain networks: Graph theoretical analysis of structural and functional systems. *Nature Reviews Neuroscience* **10**, 186–198 (2009). 1003
- 949 29. Fornito, A., Zalesky, A. & Breakspear, M. Graph analysis of the human connectome: Promise, progress, and pitfalls. *NeuroImage* **80**, 426–444 (2013). 1004
- 950 30. Zalesky, A., Fornito, A. & Bullmore, E. T. Network-based statistic: Identifying differences in brain networks. *NeuroImage* **53**, 1197–1207 (Dec. 2010). 1005
- 951 31. Zalesky, A., Cocchi, L., Fornito, A., Murray, M. M. & Bullmore, E. Connectivity differences in brain networks. *NeuroImage* **60**, 1055–1062 (2012). 1006
- 952 1007
- 953 1008
- 954 1009
- 955 1010
- 956 1011
- 957 1012
- 958 1013
- 959 1014
- 960 1015
- 961 1016
- 962 1017
- 963 1018
- 964 1019
- 965 1020
- 966 1021
- 967 1022
- 968 1023
- 969 1024
- 970 1025
- 971 1026
- 972 1027
- 973 1028
- 974 1029
- 975 1030
- 976 1031
- 977 1032
- 978

- 1033 32. Mansour L, S., Tian, Y., Yeo, B. T., Cropley, V. 1089  
1034 & Zalesky, A. High-resolution connectomic fin- 1090  
1035 gerprints: Mapping neural identity and behav- 1091  
1036 ior. *NeuroImage* **229**, 117695 (Apr. 2021). 1092
- 1037 33. Besson, P., Lopes, R., Leclerc, X., Derambure, 1093  
1038 P. & Tyvaert, L. Intra-subject reliability of the 1094  
1039 high-resolution whole-brain structural connec- 1095  
1040 tome. *NeuroImage* **102**, 283–293 (2014). 1096
- 1041 34. Atasoy, S., Donnelly, I. & Pearson, J. Human 1097  
1042 brain networks function in connectome-specific 1098  
1043 harmonic waves. *Nature Communications* **7**, 1099  
1044 10340 (Apr. 2016). 1100
- 1045 35. Besson, P. *et al.* Whole-Brain High-Resolution 1101  
1046 Structural Connectome: Inter-Subject Validation 1102  
1047 and Application to the Anatomical Segmen- 1103  
1048 tation of the Striatum. *Brain Topography* **30**, 1104  
1049 291–302 (May 2017). 1105
- 1050 36. Taylor, P. N., Wang, Y. & Kaiser, M. Within 1106  
1051 brain area tractography suggests local modular- 1107  
1052 ity using high resolution connectomics. *Scien- 1108*  
1053 *tific Reports* **7**, 39859 (Feb. 2017). 1109
- 1054 37. Moyer, D., Gutman, B. A., Faskowitz, J., Jahan- 1110  
1055 shad, N. & Thompson, P. M. Continuous rep- 1111  
1056 resentations of brain connectivity using spatial 1112  
1057 point processes. *Medical Image Analysis* **41**, 32– 1113  
1058 39 (2017). 1114
- 1059 38. Chen, X., Wang, Y., Kopetzky, S. J., Butz- 1115  
1060 Ostendorf, M. & Kaiser, M. Connectivity within 1116  
1061 regions characterizes epilepsy duration and 1117  
1062 treatment outcome. *Human Brain Mapping* **42**, 1118  
1063 3777–3791 (Aug. 2021). 1119
- 1064 39. Van Essen, D. C. *et al.* The WU-Minn Human 1120  
1065 Connectome Project: An overview. *NeuroImage* 1121  
1066 **80**, 62–79 (2013). 1122
- 1067 40. Van Essen, D. C. *et al.* The Human Connec- 1123  
1068 tome Project: A data acquisition perspective. 1124  
1069 *NeuroImage* **62**, 2222–2231 (2012). 1125
- 1070 41. Uğurbil, K. *et al.* Pushing spatial and tempo- 1126  
1071 ral resolution for functional and diffusion MRI 1127  
1072 in the Human Connectome Project. *NeuroImage* 1128  
1073 **80**, 80–104 (2013). 1129
- 1074 42. Glasser, M. F. *et al.* The minimal preprocessing 1130  
1075 pipelines for the Human Connectome Project. 1131  
1076 *NeuroImage* **80**, 105–124 (2013). 1132
- 1077 43. Van Essen, D. C., Glasser, M. F., Dierker, D. L., 1133  
1078 Harwell, J. & Coalson, T. Parcellations and 1134  
1079 hemispheric asymmetries of human cerebral cor- 1135  
1080 tex analyzed on surface-based atlases. *Cerebral 1136*  
1081 *Cortex* **22**, 2241–2262 (2012). 1137
- 1082 44. Glasser, M. F. *et al.* A multi-modal parcellation 1138  
1083 of human cerebral cortex. *Nature* **536**, 171–178 1139  
1084 (Aug. 2016). 1140
- 1085 45. Tournier, J.-D. *et al.* MRtrix3: A fast, flexible 1141  
1086 and open software framework for medical image 1142  
1087 processing and visualisation. *NeuroImage* **202**, 1143  
1088 116137 (Nov. 2019). 1144
46. Dhollander, T., Raffelt, D. & Connelly, A. *Un- 1089*  
*supervised 3-tissue response function estimation 1090*  
*from single-shell or multi-shell diffusion MR 1091*  
*data without a co-registered T1 image in ISMRM 1092*  
*Workshop on Breaking the Barriers of Diffusion 1093*  
*MRI* (2016), 5. 1094
47. Tournier, J. D., Calamante, F., Gadian, D. G. & 1095  
Connelly, A. Direct estimation of the fiber orien- 1096  
tation density function from diffusion-weighted 1097  
MRI data using spherical deconvolution. *Neu- 1098*  
*roImage* **23**, 1176–1185 (2004). 1099
48. Jeurissen, B., Tournier, J. D., Dhollander, T., 1100  
Connelly, A. & Sijbers, J. Multi-tissue con- 1101  
strained spherical deconvolution for improved 1102  
analysis of multi-shell diffusion MRI data. *Neu- 1103*  
*roImage* **103**, 411–426 (2014). 1104
49. Tournier, J. D., Calamante, F. & Connelly, A. 1105  
Improved probabilistic streamlines tractography 1106  
by 2 nd order integration over fibre orientation 1107  
distributions. *Isrm* **88**, 2010 (2010). 1108
50. Tournier, J. D., Calamante, F. & Connelly, A. 1109  
MRtrix: Diffusion tractography in crossing fiber 1110  
regions. *International Journal of Imaging Sys- 1111*  
*tems and Technology* **22**, 53–66 (2012). 1112
51. Zhang, Y., Brady, M. & Smith, S. Segmentation 1113  
of brain MR images through a hidden Markov 1114  
random field model and the expectation- 1115  
maximization algorithm. *IEEE Transactions on 1116*  
*Medical Imaging* **20**, 45–57 (2001). 1117
52. Patenaude, B., Smith, S. M., Kennedy, D. N. & 1118  
Jenkinson, M. A Bayesian model of shape and 1119  
appearance for subcortical brain segmentation. 1120  
*NeuroImage* **56**, 907–922 (2011). 1121
53. Finn, E. S. *et al.* Functional connectome finger- 1122  
printing: identifying individuals using patterns 1123  
of brain connectivity. *Nature Neuroscience* **18**, 1124  
1664–1671 (Nov. 2015). 1125
54. Amico, E. & Goñi, J. The quest for identifiabil- 1126  
ity in human functional connectomes. *Scientific 1127*  
*Reports* **8**, 1–14 (2018). 1128
55. Hopfinger, J. B., Büchel, C., Holmes, A. P. & 1129  
Friston, K. J. A study of analysis parameters 1130  
that influence the sensitivity of event- related 1131  
fMRI analyses. *NeuroImage* **11**, 326–333 (2000). 1132
56. White, T. *et al.* Anatomic and Functional Vari- 1133  
ability: The Effects of Filter Size in Group fMRI 1134  
Data Analysis. *NeuroImage* **13**, 577–588 (Apr. 1135  
2001). 1136
57. Geissler, A. *et al.* Influence of fMRI smoothing 1137  
procedures on replicability of fine scale motor lo- 1138  
calization. *NeuroImage* **24**, 323–331 (Jan. 2005). 1139
58. Fransson, P., Merboldt, K. D., Petersson, K. M., 1140  
Ingvar, M. & Frahm, J. On the effects of spatial 1141  
filtering - A comparative fMRI study of episodic 1142  
memory encoding at high and low resolution. 1143  
*NeuroImage* **16**, 977–984 (2002). 1144

- 1145 59. Mikl, M. *et al.* Effects of spatial smoothing on fMRI group inferences. *Magnetic Resonance Imaging* **26**, 490–503 (2008). 1199
- 1146  
1147
- 1148 60. Tian, Y., Margulies, D. S., Breakspear, M. & Zalesky, A. Topographic organization of the human subcortex unveiled with functional connectivity gradients. *Nature Neuroscience* **23**, 1421–1432 (Nov. 2020). 1200
- 1149  
1150  
1151  
1152
- 1153 61. Cohen, J. *Statistical Power Analysis for the Behavioral Sciences* 2nd (Lawrence Erlbaum Associates, 1988). 1201
- 1154  
1155
- 1156 62. Sarwar, T., Ramamohanarao, K. & Zalesky, A. Mapping connectomes with diffusion MRI: deterministic or probabilistic tractography? *Magnetic Resonance in Medicine* **81**, 1368–1384 (2019). 1202
- 1157  
1158  
1159  
1160
- 1161 63. Bucci, M. *et al.* Quantifying diffusion MRI tractography of the corticospinal tract in brain tumors with deterministic and probabilistic methods. *NeuroImage: Clinical* **3**, 361–368 (2013). 1203
- 1162  
1163  
1164
- 1165 64. Thomas, C. *et al.* Anatomical accuracy of brain connections derived from diffusion MRI tractography is inherently limited. *Proceedings of the National Academy of Sciences* **111**, 16574–16579 (Nov. 2014). 1204
- 1166  
1167  
1168  
1169
- 1170 65. Petersen, M. V. *et al.* Probabilistic versus deterministic tractography for delineation of the cortico-subthalamic hyperdirect pathway in patients with Parkinson disease selected for deep brain stimulation. *Journal of Neurosurgery* **126**, 1657–1668 (May 2017). 1205
- 1171  
1172  
1173  
1174  
1175
- 1176 66. Zalesky, A. *et al.* Disrupted axonal fiber connectivity in schizophrenia. *Biological Psychiatry* **69**, 80–89 (2011). 1206
- 1177  
1178
- 1179 67. Lo, Y.-C. *et al.* The loss of asymmetry and reduced interhemispheric connectivity in adolescents with autism: A study using diffusion spectrum imaging tractography. *Psychiatry Research: Neuroimaging* **192**, 60–66 (Apr. 2011). 1207
- 1180  
1181  
1182  
1183
- 1184 68. Schulte, T., Müller-Oehring, E., Sullivan, E. & Pfefferbaum, A. White matter fiber compromise contributes differentially to attention and emotion processing impairment in alcoholism, HIV-infection, and their comorbidity. *Neuropsychologia* **50**, 2812–2822 (Oct. 2012). 1208
- 1185  
1186  
1187  
1188  
1189
- 1190 69. Cao, Q. *et al.* Probabilistic Diffusion Tractography and Graph Theory Analysis Reveal Abnormal White Matter Structural Connectivity Networks in Drug-Naive Boys with Attention Deficit/Hyperactivity Disorder. *Journal of Neuroscience* **33**, 10676–10687 (June 2013). 1209
- 1191  
1192  
1193  
1194  
1195
- 1196 70. Beare, R. *et al.* Altered structural connectivity in ADHD: a network based analysis. *Brain Imaging and Behavior* **11**, 846–858 (June 2017). 1210
- 1197  
1198
71. Inguanzo, A. *et al.* Impaired Structural Connectivity in Parkinson’s Disease Patients with Mild Cognitive Impairment: A Study Based on Probabilistic Tractography. *Brain Connectivity* **11**, 380–392 (June 2021). 1211
72. Worsley, K. J., Marrett, S., Neelin, P. & Evans, A. C. Searching scale space for activation in PET images. *Human Brain Mapping* **4**, 74–90 (1996). 1212
73. Worsley, K. J. *et al.* A unified statistical approach for determining significant signals in images of cerebral activation. *Human Brain Mapping* **4**, 58–73 (1996). 1213
74. Friston, K. J., Worsley, K. J., Frackowiak, R. S. J., Mazziotta, J. C. & Evans, A. C. Assessing the significance of focal activations using their spatial extent. *Human Brain Mapping* **1**, 210–220 (1994). 1214
75. Poline, J.-B., Worsley, K., Evans, A. & Friston, K. Combining Spatial Extent and Peak Intensity to Test for Activations in Functional Imaging. *NeuroImage* **5**, 83–96 (Feb. 1997). 1215
76. Hayasaka, S., Phan, K., Liberzon, I., Worsley, K. J. & Nichols, T. E. Nonstationary cluster-size inference with random field and permutation methods. *NeuroImage* **22**, 676–687 (June 2004). 1216
77. Meade, B., Lafayette, L., Sauter, G. & Tosello, D. *Spartan HPC-Cloud Hybrid: Delivering Performance and Flexibility* 2017. 1217
- 1218  
1219  
1220  
1221  
1222  
1223  
1224  
1225  
1226  
1227  
1228

## 1229 Supplementary Information

### 1230 *S.1. Thresholding radius*

1231 This section provides the mathematical rationale behind the relationship between  $R$ ,  $\sigma$  (or alternatively FWHM),  
 1232 and  $\varepsilon$  presented in Equation 6. The truncation radius  $R$  was formulated as a function of  $\sigma$  and  $\varepsilon$  such that  
 1233 the proportion of signal loss for a 2-dimensional Gaussian kernel with the strength of  $\sigma$  truncated at a radius  
 1234 of  $R$  is equal to  $\varepsilon$ . Given that the Gaussian kernel was defined such that its total cumulative density is unity  
 1235 ( $\int_{-\infty}^{\infty} G(\delta) = 1$ ), the relationship between the smoothing parameters can be defined by the following integration  
 1236 over the 2-dimensional surface area:

$$\varepsilon = 1 - \iint_{\delta < R} G(\delta) dA \quad (S1)$$

1237 This integration can be solved in polar coordinates by the following closed form equation:

$$\begin{aligned} 1 - \varepsilon &= \int_0^{2\pi} \int_0^R G(r, \theta) r dr d\theta \\ &= \int_0^{2\pi} \int_0^R \frac{1}{(\sqrt{2\pi}\sigma)^2} e^{-\frac{r^2}{2\sigma^2}} r dr d\theta \\ &= \int_0^R \frac{1}{\sigma^2} r e^{-\frac{r^2}{2\sigma^2}} dr \\ &= -e^{-\frac{r^2}{2\sigma^2}} \Big|_0^R \\ &= 1 - e^{-\frac{R^2}{2\sigma^2}} \end{aligned} \quad (S2)$$

1238 And this can be used to describe  $R$  as a function of  $\sigma$  and  $\varepsilon$ :

$$1 - \varepsilon = 1 - e^{-\frac{R^2}{2\sigma^2}} \rightarrow \boxed{R = \sigma \sqrt{-2 \ln \varepsilon}} \quad (S3)$$

1239 And given the relationship between FWHM and  $\sigma$  (FWHM =  $\sigma \sqrt{8 \ln 2}$ ), this equation can be rewritten based  
 1240 on FWHM:

$$\boxed{R(\text{FWHM}, \varepsilon) = \text{FWHM} \sqrt{-\log_2 \varepsilon}} \quad (S4)$$

### 1241 *S.2. CBS for atlas-based connectivity*

1242 In the main text, it was briefly mentioned that mapping the high-resolution connectivity is not necessary for  
 1243 smoothing the connectivity matrices at an atlas resolution: alternatively, a smoothed version of an atlas-based  
 1244 connectivity matrix can be derived from a soft parcellation, which is derived by applying spatial smoothing  
 1245 to the parcels of the brain atlas (and normalizing each vertex to a unity sum of parcel memberships). In this  
 1246 section, we provide the formal proof of this equivalence: first, downsampling a high-resolution connectivity  
 1247 matrix to an atlas-based connectome matrix is formulated by linear algebraic formulations; these formulations  
 1248 are then used to complete a formal proof of the equivalence.

1249 Following the prior nomenclature,  $A$  is a  $v \times v$  matrix denoting the high-resolution connectivity matrix where  
 1250  $v$  is the number of vertices. According to Equation 4, the smoothed high-resolution connectivity matrix  $A_s$   
 1251 is calculated as follows:

$$A_s = F_s A F_s^T \quad (S5)$$

1252 Where  $F_s$  is a  $v \times v$  column-normalized spatial smoothing kernel. A formal notion of a brain atlas can be  
 1253 denoted by  $p \times v$  matrix  $P$ , where  $p$  is the number of brain regions in the atlas. Elements  $P(i, j)$  encode the  
 1254 relationship between vertex/voxel  $v_i$  and region  $p_j$ .

$$P(i, j) = \begin{cases} 1, & \text{if } v_j \in p_i \\ 0, & \text{otherwise} \end{cases} \quad (S6)$$



An atlas-resolution connectome  $A_p$  is a  $p \times p$  matrix, which is normally mapped from an atlas parcellation such that elements  $A_p(i, j)$  encode the aggregate contribution from those streamlines for which one endpoint is assigned to region  $p_i$  and the other endpoint is assigned to region  $p_j$  (showing here the streamline count for simplicity):

$$A_p(i, j) = \sum_{v_k \in p_i \& v_l \in p_j} A(k, l) \quad (\text{S7})$$

This notion can be formalized by the following matrix representation which can be used to derive  $A_p$  from  $A$  and  $P$ :

$$A_p = PAP^T \quad (\text{S8})$$

Hence, the element  $A_p(i, j)$  counts the overall connectivity between regions  $p_i$  and  $p_j$  by adding all high-resolution connectivity edges between them. Equations S5 and S8 yield the following definition for the smoothed atlas-based connectivity  $A_{sp}$ :

$$A_{sp} = PA_s P^T = PF_s A F_s^T P^T = (PF_s) A (PF_s)^T \quad (\text{S9})$$

The matrix  $PF_s$  can thus be treated as a  $p \times v$  weighted soft parcellation map, i.e. a non-binary brain atlas. This soft parcellation can be used to generate smoothed connectomes based on an atlas parcellation (each streamline contributes to many connectome edges, based on all parcels with non-zero densities at both endpoints) (see Equation S8). A key benefit of this approach is that it obviates the need to create computationally cumbersome high-resolution connectomes as an intermediate step in construction of lower-resolution connectome matrices. A different approach to compute this soft parcellation, that additionally does not necessitate computation of high-resolution smoothing matrix  $F_s$ , is further described in the ensuing sections.

### S.2.1. Column normalization

To describe the soft parcellation  $PF_s$ , a formal definition of normalizing every column should first be defined. Column normalization of an  $l \times m$  matrix  $B$  can be defined by the matrix multiplication of  $B$  with a diagonal norm matrix constructed from column sums.

**Definition S.1.**  $\langle |B| \rangle$  denotes an  $m \times m$  diagonal column norm matrix constructed from  $B$  where  $\langle |B| \rangle(i, i)$  is the sum of the elements of the  $i$ th column in  $B$ :

$$\langle |B| \rangle(i, j) = \begin{cases} \sum_{\forall k} B(k, j), & \text{if } i = j \\ 0, & \text{if } i \neq j \end{cases} \quad (\text{S10})$$

Hence,

$$\langle |B| \rangle = \begin{bmatrix} \sum_{\forall k} B(k, 1) & 0 & \cdots & 0 \\ 0 & \sum_{\forall k} B(k, 2) & \cdots & 0 \\ \vdots & \vdots & \ddots & \vdots \\ 0 & 0 & \cdots & \sum_{\forall k} B(k, l) \end{bmatrix} \quad (\text{S11})$$

And a consequence of Definition S.1 is the statement in the next corollary.

**Corollary S.1.1.** Let  $z_i \in \mathbb{R}^i$  denote the vector of ones, i.e. all  $i$  vector elements equal 1. The following is true for any diagonal norm matrix:

$$z_l B = z_m \langle |B| \rangle \quad (\text{S12})$$

Both sides of the equation above compute the column sums of  $B$ . Column normalization can be formally defined by the following theorem.

**Theorem S.1.** The row normalization is a matrix transformation of an  $l \times m$  matrix  $B$  to an  $l \times m$  normalized matrix  $N(B)$ , such that the sum of every column in  $N(B)$  is equal to 1, i.e.  $z_l N(B) = z_m$ .  $N(B)$  can be derived by the following matrix multiplication:

$$N(B) = B \langle |B| \rangle^{-1} \quad (\text{S13})$$

1286 *Proof.* Corollary S.1.1 can be used to prove  $z_l N(B) = z_m$ :

$$z_l N(B) = z_l B \langle |B| \rangle^{-1} = z_m \langle |B| \rangle \langle |B| \rangle^{-1} = z_m I_m = z_m$$

1287

□

1288 Where  $I_m$  is the  $m \times m$  identity matrix. The following remarks are a consequence of the aforementioned  
1289 definitions and theorems.

1290 **Remark.** The diagonal norm matrix of a brain atlas parcellation  $\langle |P| \rangle$  is the  $v \times v$  identity matrix  $I_v$ , as every  
1291 vertex belongs to a single atlas region and thus the sum of any column of  $P$  equals 1:

$$\langle |P| \rangle = I_v \Rightarrow z_p P = z_v \quad (\text{S14})$$

1292 Thus, for any arbitrary  $v \times v$  matrix  $X$ :

$$\langle |PX| \rangle = \langle |X| \rangle \quad (\text{S15})$$

1293  $\langle |PX| \rangle$ , by definition, is a diagonal matrix:

$$z_v \langle |PX| \rangle = z_p PX \quad (\text{S16})$$

1294 and from Equation S14 we know that:

$$z_p PX = z_v X = z_v \langle |X| \rangle \quad (\text{S17})$$

1295 Therefore,  $\langle |X| \rangle$  is the same diagonal matrix as  $\langle |PX| \rangle$ . In other words, the sum of the columns of  $PX$  is  
1296 equal to the sum of the columns of  $X$ .

1297 **Remark.** The normalized high-resolution smoothing kernel  $F_s$  is defined from column normalization of the  
1298 Gaussian kernel smoothing weights matrix  $F_G$  (from Equation S13):

$$F_s = N(F_G) = F_G \langle |F_G| \rangle^{-1} \quad (\text{S18})$$

1299 Where  $F_G$  is a symmetric  $v \times v$  matrix yielded from the truncated Gaussian function calculated upon the  
1300 surface mesh:

$$F_G(i, j) = \begin{cases} G(\delta_{ij}), & \text{if } \delta_{ij} < R(\text{FWHM}, \varepsilon) \\ 0, & \text{otherwise} \end{cases} \quad (\text{S19})$$

### 1301 S.2.2. Smoothed brain atlas

1302 Equation S9 showed that a smoothed soft parcellation  $P_s = PF_s$  can be used to directly derive smoothed  
1303 atlas connectivity maps from tractography. In this section, a formal proof will be provided for the following  
1304 statement:

1305 **Theorem S.2.** The smoothed soft parcellation  $P_s = PF_s$  can be computed in the absence of  $F_s$ , by separately  
1306 smoothing every row of  $P$ , followed by normalizing every column of the smoothed parcellation:

$$P_s = N(PF_G) \quad (\text{S20})$$

1307 *Proof.* Using the previously derived equations, we prove that  $P_s = N(PF_G)$ :

$$\begin{aligned} P_s &= PF_s && \text{: from Equation S9} \\ &= PF_G \langle |F_G| \rangle^{-1} && \text{: from Equation S18} \\ &= PF_G \langle |PF_G| \rangle^{-1} && \text{: from Equation S15} \\ &= N(PF_G) && \text{: from Equation S13} \end{aligned}$$

1308

□

The proof above confirms that structural connectivity based on a parcellation atlas, incorporating CBS, can be constructed directly from a tractogram and soft parcellation, without necessitating computation of either the high-resolution smoothing matrix or the high-resolution connectome. To smooth an atlas-resolution connectome, the brain atlas  $P$  should first be transformed to a normalized smoothed soft parcellation  $P_s = N(PF_G)$ .  $PF_G$  is equivalent to independently smoothing the binary representation of each parcel, while the normalization of such ensures that the sum of parcel memberships of every vertex is 1. Hence, the soft-parcellation  $P_s$  can be computed by spatial smoothing and then be directly combined with the tractogram to produce a connectome: each streamline endpoint may have non-zero attribution to multiple parcels, and the contribution of the streamline to the connectome is therefore distributed across the set of edges associated with those two sets of parcels. This constitutes an approach to apply CBS on atlas-resolution connectomes that does not require any high-resolution connectomic computations.

### S.3. Replication of ROC curve estimates

The computation of ROC curves reported in the manuscript relied on the assumption of a fixed false omission rate ( $\lambda = \frac{FN}{FN+TN}$ ). To ensure that the findings were not biased by the selected value for  $\lambda$ , the same analyses was repeated for a range of plausible values of  $\lambda \in \{10\%, 1\%, 0.1\%\}$ . Fig. S1 presents the results of this evaluation. The findings indicate that CBS increases the sensitivity of the statistical analyses and the inference power, particularly for connectomes mapped from probabilistic tractography, regardless of the selection made for the false omission rate  $\lambda$ .

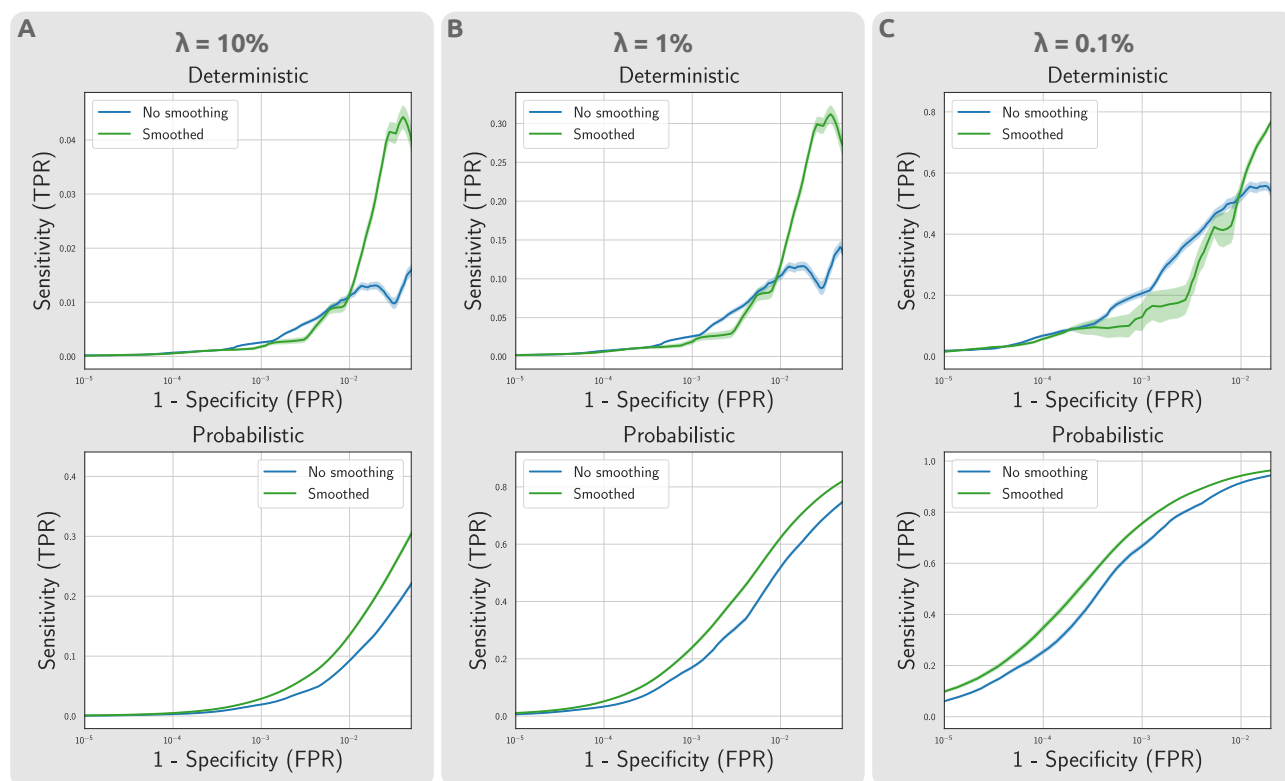

**Fig. S1.** Impact of CBS on statistical power of mass univariate testing on atlas-based connectomes, for different false omission rate assumptions. The estimated ROC curves demonstrate the respective changes in sensitivity and specificity of the suprathreshold edges at different effect thresholds. The analyses was repeated across a range of false omission rates to ensure the robustness of findings with regards to parameter selection.
